# Supplementary material for: Enhanced late-outgrowth circulating endothelial progenitor cell levels in rheumatoid arthritis and correlation with disease activity
Source: Springer Nature journal article supplement (doi:10.1186/ar2934), 2010-02-16

(a)

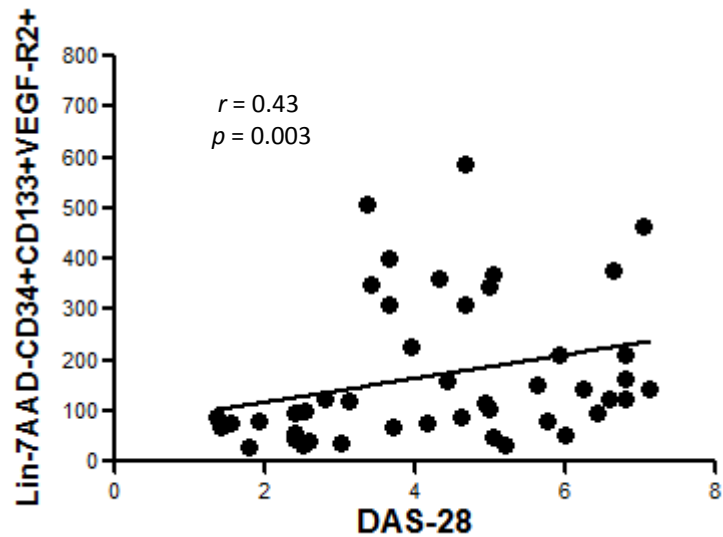

(b)

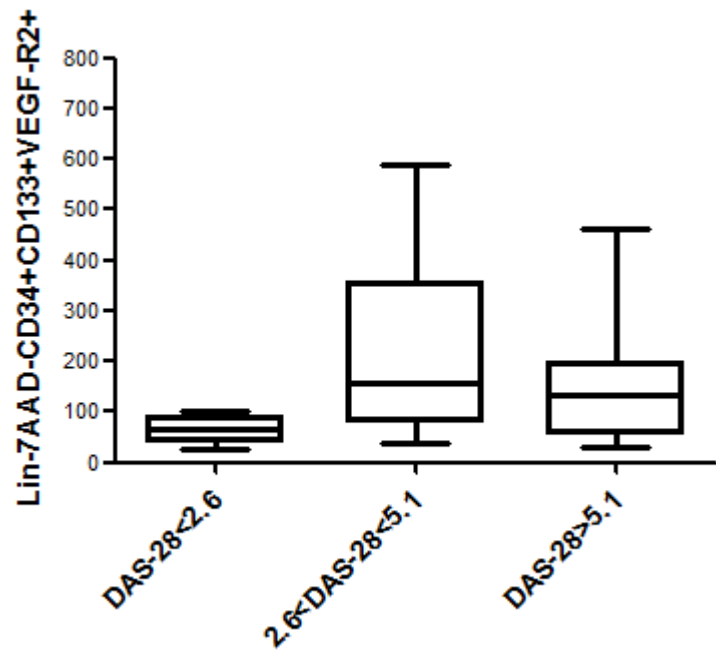

Supplement: 13075_2009_2769_MOESM3_ESM.pdf [file 13075_2009_2769_MOESM3_ESM.pdf]
